# Supplementary material for: Hydrothermal fabrication of hierarchically macroporous Zn2SnO4 for highly efficient dye-sensitized solar cells
Source: Royal Society of Chemistry journal article supplement (doi:10.1039/c3nr01133j), 2013-01-01
Supplement: c3nr01133j.pdf [file c3nr01133j.pdf]

## Supporting Information

# Hydrothermal Fabrication of Hierarchically Macroporous $\text{Zn}_2\text{SnO}_4$ for Highly Efficient Dye-sensitized Solar Cells

Yu-Fen Wang, Ke-Nan Li, Yang-Fan Xu, Hua-Shang Rao, Cheng-Yong Su, and  
Dai-Bin Kuang\*

*MOE Key Laboratory of Bioinorganic and Synthetic Chemistry, KLGHEI of Environment and Energy Chemistry, State Key Laboratory of Optoelectronic Materials and Technologies, School of Chemistry and Chemical Engineering, Sun Yat-sen University, Guangzhou 510275, P. R. China.*

**Email:** [kuangdb@mail.sysu.edu.cn](mailto:kuangdb@mail.sysu.edu.cn).

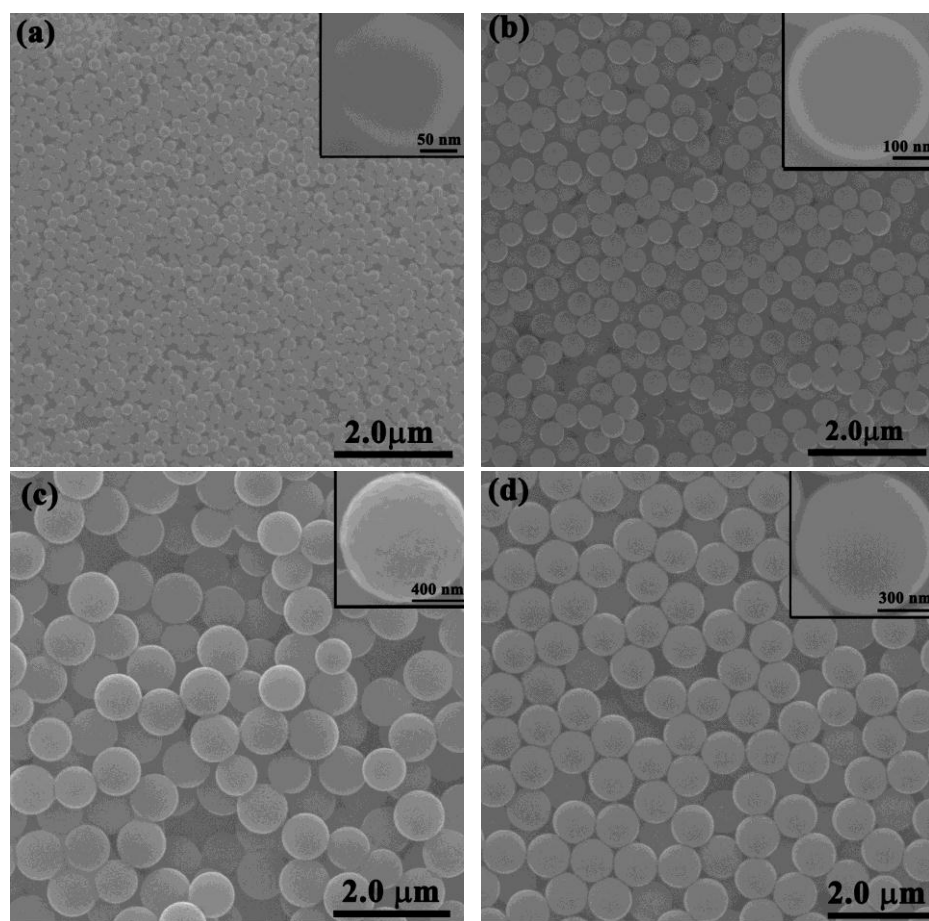

**Fig. S1** FE-SEM image of the PS: (a) 200 nm, (b) 400 nm, (c) 600 nm and (d) 750 nm. Insets are the corresponding high-magnification FE-SEM images.

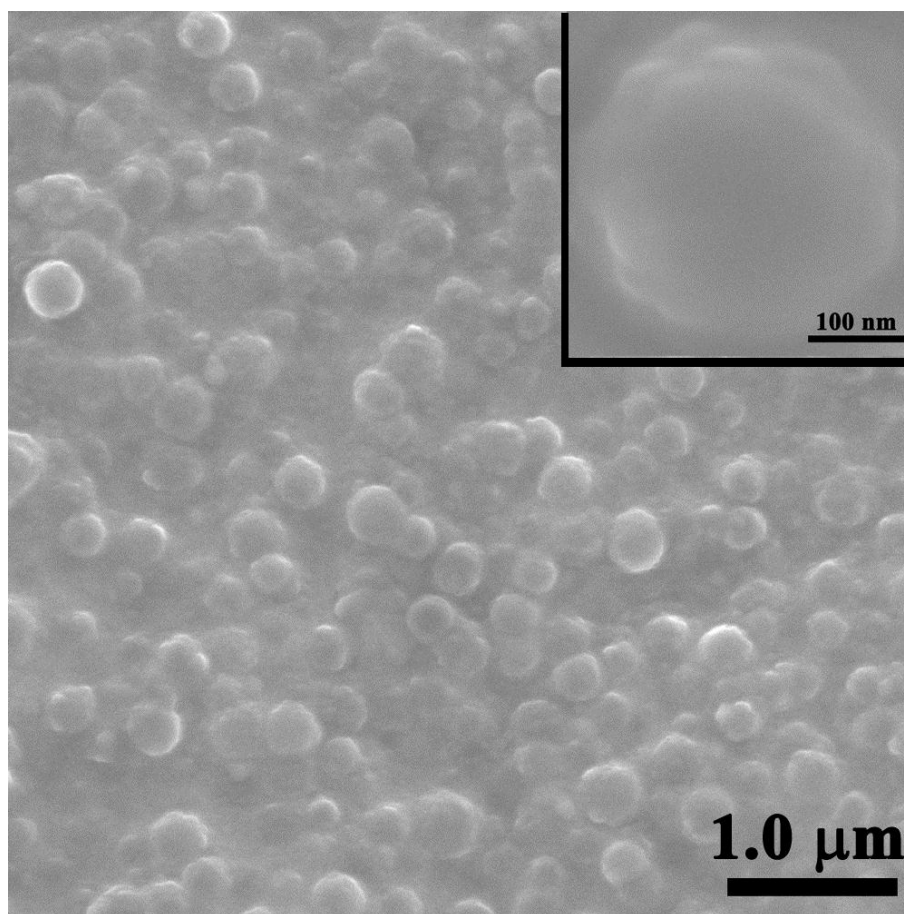

**Fig. S2** FE-SEM image of the PS@Zn<sub>2</sub>SnO<sub>4</sub> nanocrystal. Insets are the corresponding high-magnification FE-SEM images

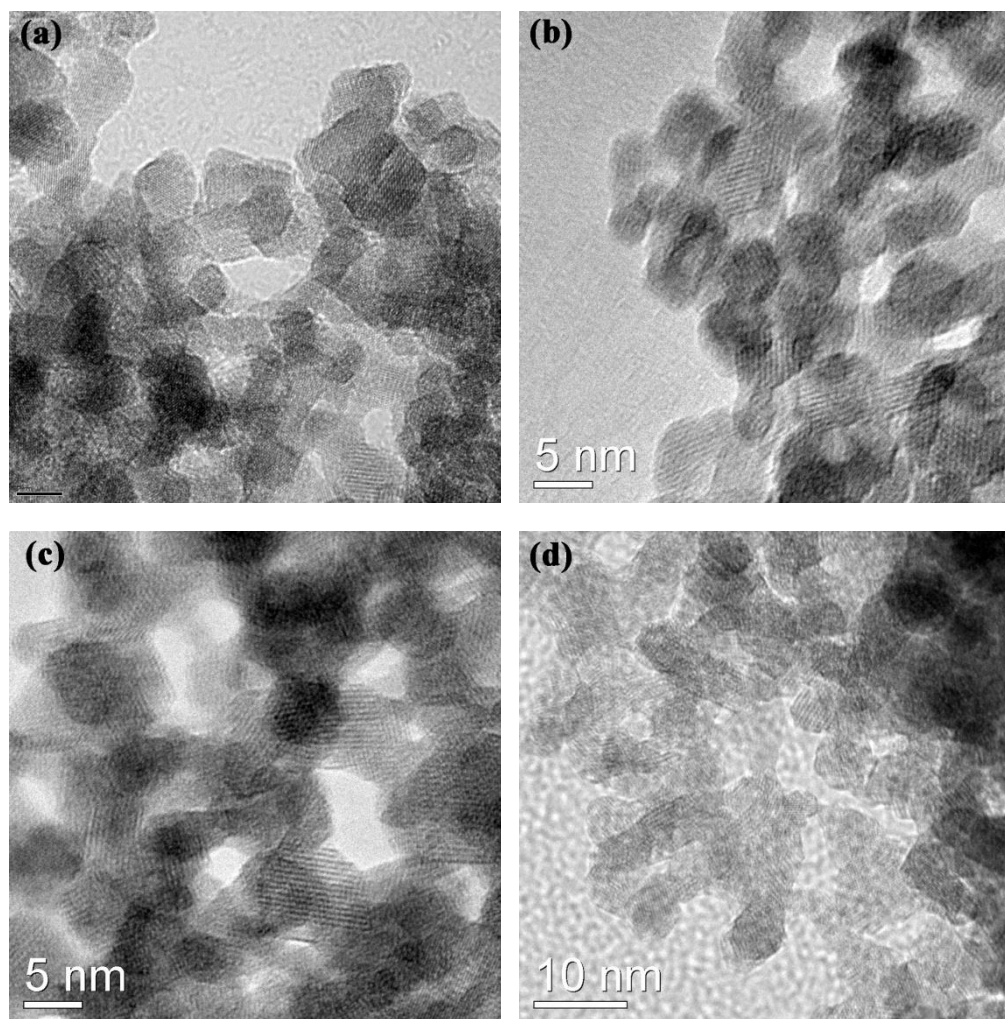

**Fig. S3** High-magnification TEM images of Zn<sub>2</sub>SnO<sub>4</sub> NPs of different sizes of macroporous Zn<sub>2</sub>SnO<sub>4</sub>: (a) **I**, (b) **II**, (c) **III** and (d) **IV**.

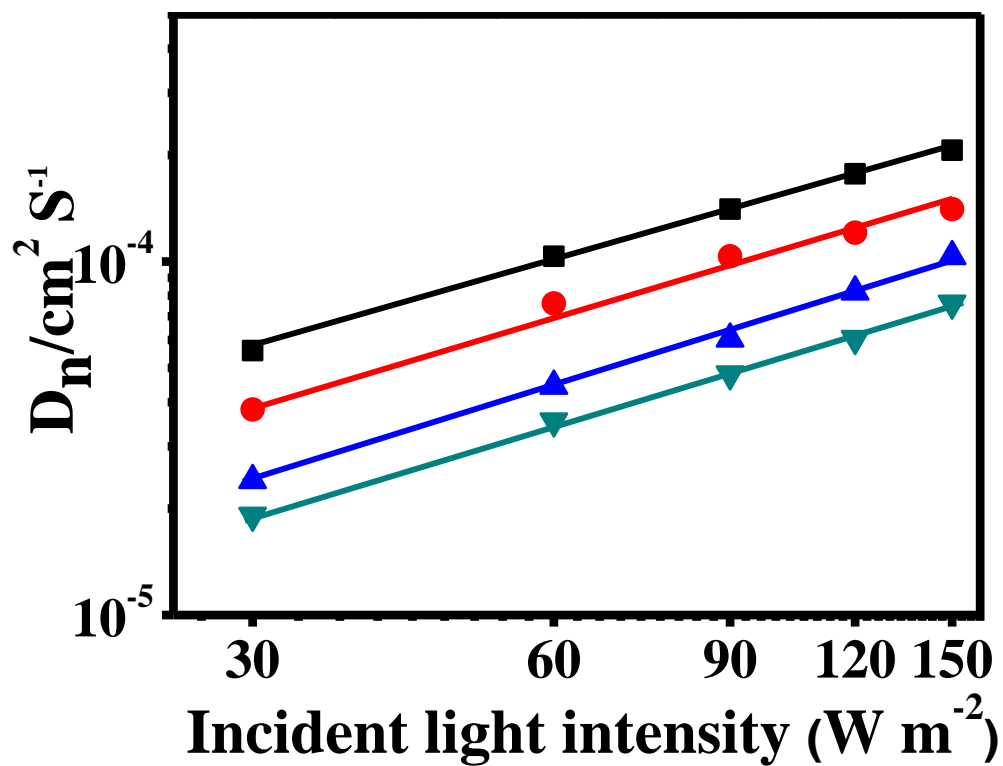

**Fig. S4** The electron diffusion coefficient of DSSCs based on different  $\text{Zn}_2\text{SnO}_4$  photoelectrodes,  $\blacksquare$ : I,  $\bullet$ : II,  $\blacktriangle$ : III and  $\blacktriangledown$ : IV.

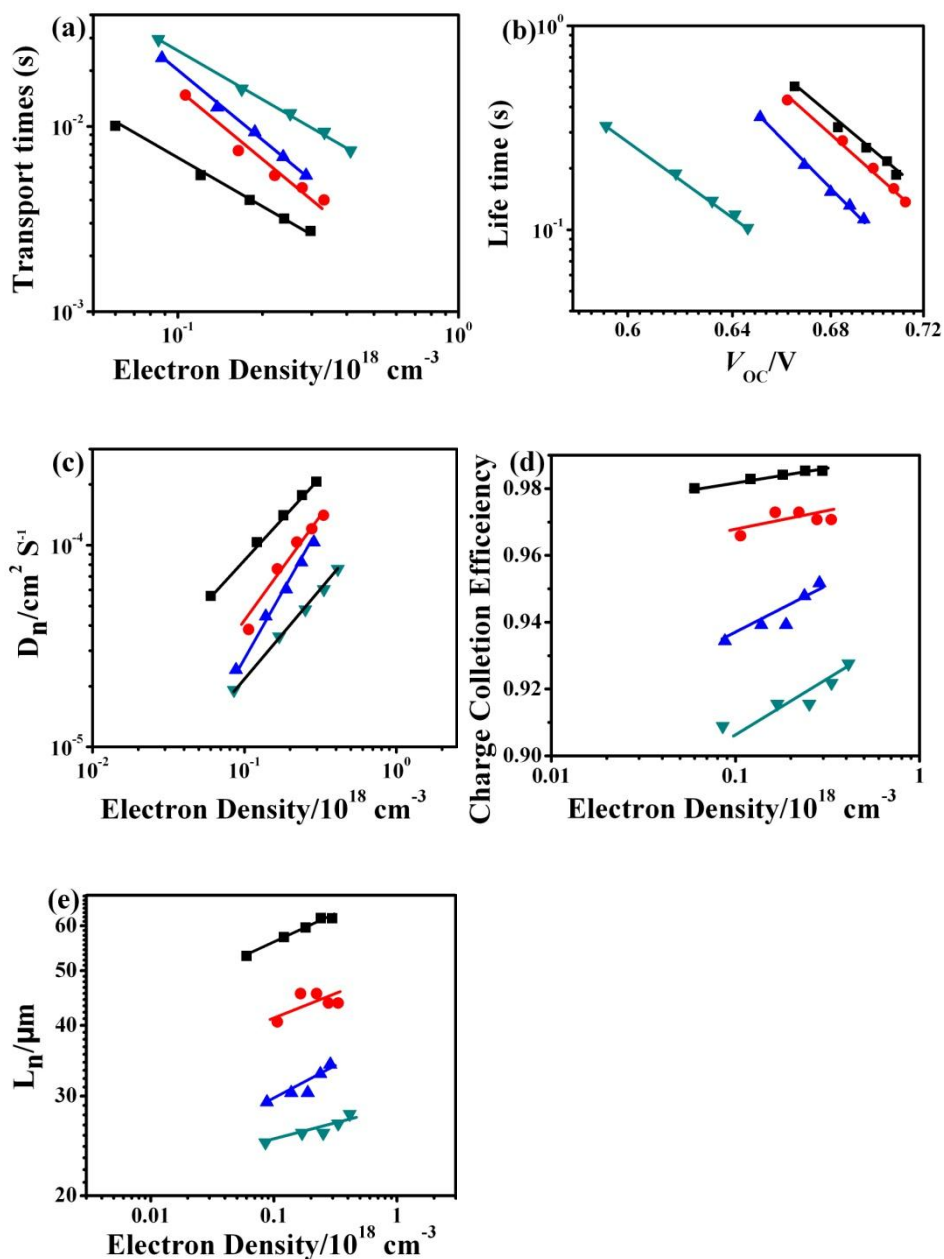

**Fig. S5** (a) The electron transport time as a function of photoelectron density, (b) electron recombination time constant as a function of open-circuit voltage under different light intensity, (c) electron diffusion coefficient as a function of photoelectron density, (d) electron collection efficiency as a function of photoelectron density, and (e) effective electron diffusion length as a function of photoelectron density. The DSSCs based on different hierarchical macroporous Zn<sub>2</sub>SnO<sub>4</sub> photoelectrodes with the film thickness of ~15 μm, ■: 180 nm, ●: 375 nm, ▲: 550 nm and ▼: 650 nm.



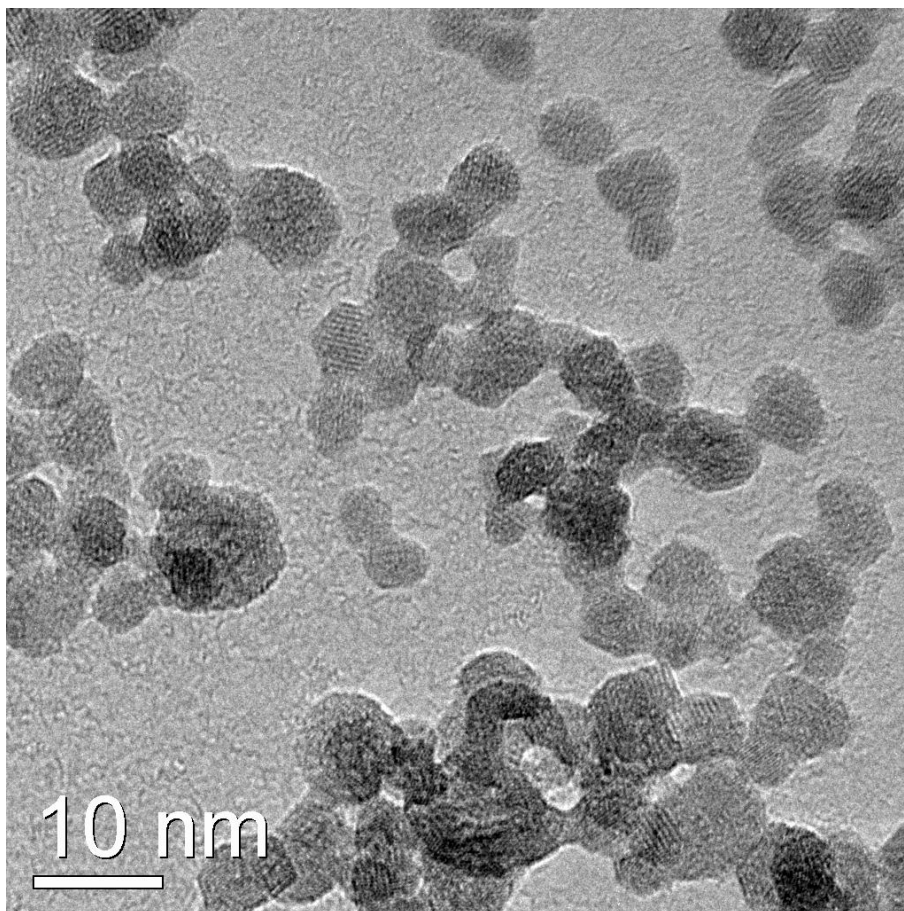

**Fig. S6** High-magnification TEM images of Zn<sub>2</sub>SnO<sub>4</sub> NPs prepared via the hydrothermal process in the absence of PS spheres.

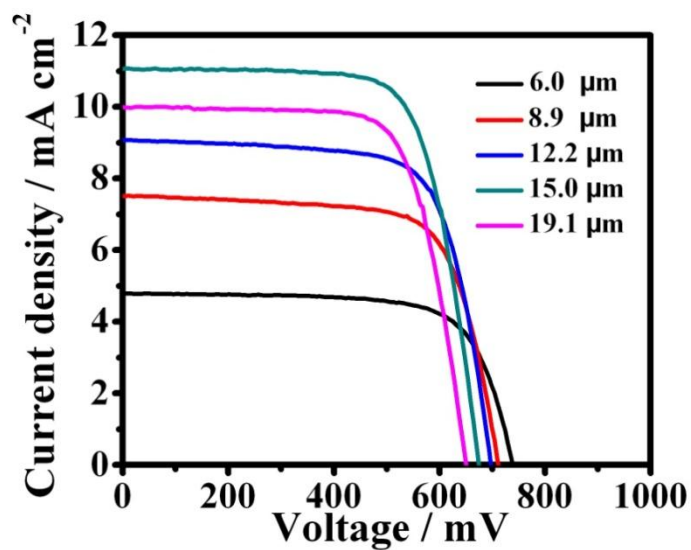

**Fig. S7** Photocurrent density-voltage ( $J$ - $V$ ) curves of the DSSCs based 4.2 nm  $Zn_2SnO_4$  nanoparticle with different thicknesses.

**Table S1.** Detailed photovoltaic parameters ( $J_{sc}$ ,  $V_{oc}$ , FF, and  $\eta$ ) of dye-sensitized 4.2 nm  $Zn_2SnO_4$  nanoparticle solar cells with different thicknesses.

| Film thickness / $\mu\text{m}$ | $J_{sc}$ / $\text{mA cm}^{-2}$ | $V_{oc}$ / mV | $\eta$ / % | FF   |
|--------------------------------|--------------------------------|---------------|------------|------|
| 6.0                            | 4.79                           | 739           | 2.54       | 0.72 |
| 8.9                            | 7.29                           | 713           | 3.75       | 0.72 |
| 12.2                           | 9.07                           | 697           | 4.51       | 0.71 |
| 15.0                           | 11.05                          | 674           | 5.36       | 0.72 |
| 19.1                           | 9.99                           | 650           | 4.67       | 0.72 |

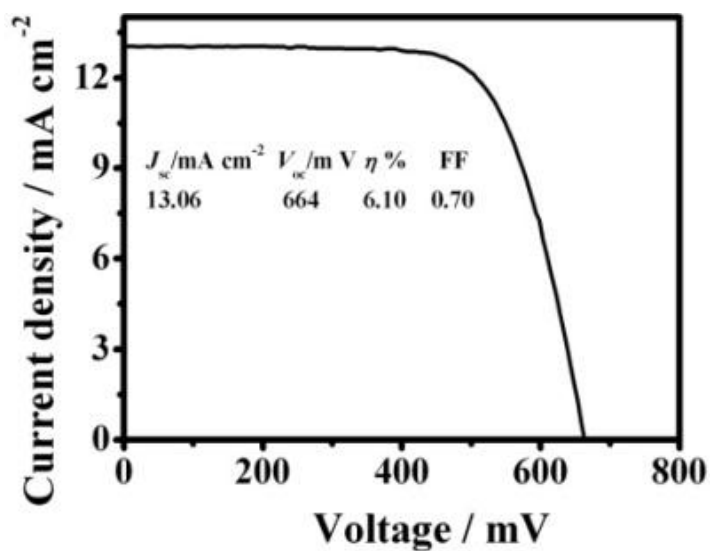

**Fig. S8** Photocurrent density-voltage ( $J$ - $V$ ) curves of the DSSCs based on a double layer photoelectrode consisting of 4.2 nm  $\text{Zn}_2\text{SnO}_4$  nanoparticle (15  $\mu\text{m}$  in thickness) and 180 nm  $\text{Zn}_2\text{SnO}_4$  macropore (4  $\mu\text{m}$  in thickness).
